# Supplementary material for: Topological Analysis of Hedgehog Acyltransferase, a Multipalmitoylated Transmembrane Protein
Source: PubMed Central journal article supplement (PMC4319003; doi:10.1074/jbc.m114.614578), 2014-12-12
Supplement: supp_M114.614578_jbc.M114.614578-1.pdf [file supp_M114.614578_jbc.M114.614578-1.pdf]

|                    |                                                                |                      |          |
|--------------------|----------------------------------------------------------------|----------------------|----------|
| H.sapiens          | -----                                                          | M                    | 1        |
| M.fascicularis     | -----                                                          | M                    | 1        |
| P.troglodytes      | -----                                                          | M                    | 1        |
| P.paniscus         | -----                                                          | M                    | 1        |
| N.leucogenys       | -----                                                          | M                    | 1        |
| M.musculus         | -----                                                          | M                    | 1        |
| R.norvegicus       | -----                                                          | M                    | 1        |
| S.scrofa           | -----                                                          | M                    | 1        |
| C.hircus           | -----                                                          | M                    | 1        |
| C.lupus            | -----                                                          | M                    | 1        |
| M.putorius         | MFTTPQAVKQVPRKARLPSTPPSYLLPPAERRGDHWAGFRAPWSPFRNSQCVCLDPSSQGTM |                      | 60       |
| O.orca             | -----                                                          | M                    | 1        |
| C.simum            | -----                                                          | M                    | 1        |
| D.rerio            | -----                                                          | MTPKWELVS            | 9        |
| A.mississippiensis | -----                                                          | MV                   | 2        |
| V.pacos            | -----                                                          | M                    | 1        |
| C.ferus            | -----                                                          | M                    | 1        |
| P.sinensis         | -----                                                          | MLQVAM               | 6        |
| M.lucifugus        | -----                                                          | M                    | 1        |
| L.chalumnae        | -----                                                          | MQNSGNQKPKQKPALRIVR  | 18       |
| P.hodgsonii        | -----                                                          | M                    | 1        |
| B.mutus            | -----                                                          | M                    | 1        |
| C.elegans          | -----                                                          | MTPSHPEVPPPRQKQ----- | TLFEY 20 |

|                    |                                                               |                    |     |
|--------------------|---------------------------------------------------------------|--------------------|-----|
| H.sapiens          | LPRWELALYLLASLGFHFYSFYEVYKVSREHEEELDQEF----                   | ELETDTLFGGLKKDPTD  | 57  |
| M.fascicularis     | LPRWELALYLLASLGFHFYSFYEVYKVSREHEEELDQEF----                   | ELETDTLFGGLKKDPTD  | 57  |
| P.troglodytes      | LPQWELALYLLASLGFHFYSFYEVYKVSREHEEELDQEF----                   | ELETDTLFGGLKKDPTD  | 57  |
| P.paniscus         | LPQWELALYLLASLGFHFYSFYEVYKVSREHEEELDQEF----                   | ELETDTLFGGLKKDPTD  | 57  |
| N.leucogenys       | LPRWELALYLLASLGFHFYSFYEVYKVSREHEEELDQEF----                   | ELETDTLFGGLKKDPTD  | 57  |
| M.musculus         | LPGWELTLCLLVSLGFHFYSFYEVYKVSREHEEELDQEF----                   | ELEMDTLFGGLKKDPTD  | 57  |
| R.norvegicus       | LSRWELTLCLLVSLGFHFYSFYEVYKVSREHEEELDQEF----                   | ELEMDTLFGGLK-----  | 52  |
| S.scrofa           | LPRWELSYLLASLGFHFYSFYEVYKVSREHEEELDQEF----                    | DLETDSLFGGLKKDPTD  | 57  |
| C.hircus           | LPWWELSYLLASLGFHFYSFYEVYKVSREHEEELDRQF----                    | DLETGTLFGGLKKDPTD  | 57  |
| M.putorius         | LPWELSYLLASLGFHFYSFYEVYKVSREHEEELDRQF----                     | DLETGTLFGGLKKDPTD  | 57  |
| O.orca             | LPRWELSYLLASLGFHFYSFYEVYKVSREHEEELDRQF----                    | ALEIGTLFGGLKKDPTD  | 116 |
| C.simum            | LPRWELSYLLASLGFHFYSFYEVYKVSREHEEELDRQF----                    | DLDTDTLFGGLKKDPTD  | 57  |
| D.rerio            | LPRWELSYLLASLGFHFYSFYEVYKVSREHEEELDRQF----                    | DLETDTLFGGLKKDPTD  | 57  |
| A.mississippiensis | LPRWELSYLLASLGFHFYSFYEVYKVSREHEEELDRQF----                    | QLERGFLLWGFKKPTD   | 65  |
| V.pacos            | LPLWEMCLYLLASLGFHFYSFYEVYKVSREHEEELDRQF----                   | ELEKNAFLWGGLKKDPTD | 58  |
| C.ferus            | LPRWELFLYLLASLGFHFYSFYEVYKVSREHEEELDRQF----                   | DLETDTLFGGLKKDPTD  | 57  |
| P.sinensis         | LPRWELFLYLLASLGFHFYSFYEVYKVSREHEEELDRQF----                   | DLETDTLFGGLKKDPTD  | 57  |
| M.lucifugus        | LPRWELFLYLLASLGFHFYSFYEVYKVSREHEEELDRQF----                   | DLETDTLFGGLKKDPTD  | 57  |
| L.chalumnae        | LPRWELFLYLLASLGFHFYSFYEVYKVSREHEEELDRQF----                   | DLETDTLFGGLKKDPTD  | 57  |
| P.hodgsonii        | LPRWELFLYLLASLGFHFYSFYEVYKVSREHEEELDRQF----                   | DLETDTLFGGLKKDPTD  | 57  |
| B.mutus            | LPRWELFLYLLASLGFHFYSFYEVYKVSREHEEELDRQF----                   | DLETDTLFGGLKKDPTD  | 57  |
| C.elegans          | PPLKEVPICLFAVTVCTMAYAWYGVYRASQQFEWSIGDYGIWSSPPIIGNLTGMLMKDVSN |                    | 80  |

\* : : \* : : \* : : \* : : \* : : \*

|                    |                                                                  |                   |              |
|--------------------|------------------------------------------------------------------|-------------------|--------------|
| H.sapiens          | FEWSFWMWGWKQWLWVLLLGHMVVSQMATLLARKHRPWILMLYGMWAC---              | WCVLGTPGV         | 114          |
| M.fascicularis     | FEWSFWMWGWKQWLWVLLLGHMVVSQMATLLARKHRPWILMLYGMWAC---              | WCVLGTPGV         | 114          |
| P.troglodytes      | FEWSFWMWGWKQWLWVLLLGHMVVSQMATLLARKHRPWILMLYGMWAC---              | WCVLGTPGV         | 114          |
| P.paniscus         | FEWSFWMWGWKQWLWVLLLGHMVVSQMATLLARKHRPWILMLYGMWAC---              | WCVLGTPGV         | 114          |
| N.leucogenys       | FEWSFWMWGWKQWLWVLLLGHMVVSQMATLLARKHRPWILMLYGMWAC---              | WCVLGTPGV         | 114          |
| M.musculus         | FEWNFMWGWKRRVLWVLFIGHMAVSQLATLLTKKRPWIVMVGWAC---                 | WCVLGAPGV         | 114          |
| R.norvegicus       | -----                                                            | KHRPWIIMYGMWAC--- | WCVLGAPGV 76 |
| S.scrofa           | FEWSFWMWGWKQRLAWLLLGHVGVSVQVANLLARKHRPWILAAYGMWAC---             | HCALGTRGT         | 114          |
| C.hircus           | FEWSFWMWGWKQRLAWLLLGHVGVSVQVANLLSRKHKPWILAAYGMWAC---             | RCVLGTRGT         | 114          |
| C.lupus            | FEWSFWMWGWKQRLVRFPLFGHMVVSQMANVLARKHRPWILGAYGMWAS---             | WCVLGAHGT         | 114          |
| M.putorius         | FEWSFWMWGWKQRLRPLFGHVAVSQLANVLARKHRPWILGAYGIWAS---               | WCVLGAHGT         | 173          |
| O.orca             | FEWSFWMWGWKQRLVWLLLGHMVVSQVANLLTRKHKPWILAYGMWAC---               | WCVELTQGT         | 114          |
| C.simum            | FEWSFWMWGWKQWLWVLLLGHAAVVSQMANLLARKHRPWILAYGMWAC---              | WCVLGAPGV         | 114          |
| D.rerio            | FEWSFWMWGWKQRLWVLLLGHVAVSRLAYYLQPQYRLAVFAMYGLISA---              | GWLLGVRGV         | 122          |
| A.mississippiensis | FEWSFWMWGWKQRLWVLLLGHVAVSRLAYYLQPQYRLAVFAMYGLISA---              | GWLLGVRGV         | 122          |
| V.pacos            | FEWNFMWGWKQRLAWLLLGHVGVSVQVANLLSRKHKPWILAAYGMWAC---              | QCVLGAQGT         | 114          |
| C.ferus            | FEWNFMWGWKQRLAWLLLGHVGVSVQVANLLSRKHKPWILAAYGMWAC---              | QCVLGAQGT         | 114          |
| P.sinensis         | FEWTFWMWGWKERIWLWLLLGHVAVSRLAYYLQPQYRLAVFAMYGLISA---             | WFLGKINGL         | 119          |
| M.lucifugus        | FEWSFWMWGWKQRLWVLLLGHVAVSRLAYYLQPQYRLAVFAMYGLISA---              | WFLGKINGL         | 119          |
| L.chalumnae        | FEWSFWMWGWKQRLWVLLLGHVAVSRLAYYLQPQYRLAVFAMYGLISA---              | WFLGKINGL         | 119          |
| P.hodgsonii        | FEWSFWMWGWKQRLWVLLLGHVAVSRLAYYLQPQYRLAVFAMYGLISA---              | WFLGKINGL         | 119          |
| B.mutus            | FEWSFWMWGWKQRLWVLLLGHVAVSRLAYYLQPQYRLAVFAMYGLISA---              | WFLGKINGL         | 119          |
| C.elegans          | WEWSRWSPPFALSYL--PVFFGHVLFVFNIGSAILPESAF--IPIIYTLCSIAAAYVNFPPFLV |                   | 137          |

: \* : :

Figure S1

|                     |                                                               |     |
|---------------------|---------------------------------------------------------------|-----|
| H. sapiens          | AMVLLHHTTISFCVAQF-RSQLLTWLCSLLLLSTLRLQGVVEVKRRWYKTENEYLLQFTL  | 173 |
| M. fascicularis     | AMVLLHHTTISFCVAQF-RSQLLTWLCSLLLLSTLRLQGVVEVKRRWYKTENEYLLQFTL  | 173 |
| P. troglodytes      | AMVLLHHTTISFCVAQF-RSQLLTWLCSLLLLSTLRLQGVVEVKRRWYKTENEYLLQFTL  | 173 |
| P. paniscus         | AMVLLHHTTISFCVAQF-RSQLLTWLCSLLLLSTLRLQGVVEVKRRWYKTENEYLLQFTL  | 173 |
| N. leucogenys       | AMVLLHHTTISFCVAQF-RSQLLTWLCSLLLLSTLRLQGVVEVKRRWYKTENEYLLQFTL  | 173 |
| M. musculus         | VMVLLHSTIAFCVAQF-RSVLLSWLCSLLLLSTLRLQGVVEVKRRWYKTENEYLLQFTL   | 173 |
| R. norvegicus       | VMVLLHSTIAFCVAQF-RSMLLSWLCSLLLLSTLRLQGVVEVKRRWYKTENEYLLQFTL   | 135 |
| S. scrofa           | AMVLLHHTTISFCVAQF-RSLALSWSLFLLLSTLRLQDVEEVKRGWYETENEYLLQFTL   | 173 |
| C. hircus           | AMVLLHHTTISFCVAQF-RSQFLSWLCSLLLLSTLRLQDVEEVKRGWCTENECYLLQFTL  | 173 |
| C. lupus            | AIIFLHTLISFCVAQF-RSLALTWLCFLLLSTLRLQDVEEVKRGWYQTEENEYLLQFTL   | 173 |
| M. putorius         | AIIFLHTLISFCVAQF-RSLFLTWLCFLLLSTLRLQDVEEVKRGWYQTEENEYLLQFTL   | 232 |
| O. orca             | AMVLIHTTISFCVAQF-RSLFSLWLCFLLLSTLRLQDVEEVKRGWYETENEYLLQFTL    | 173 |
| C. simum            | AMVFLHTTISFCVAQF-RSLLLSWLCFLLLSTLRLQDVEEVKRGWYQTEENEYLLQFTL   | 173 |
| D. rerio            | IQLMHLHSISLVDAQL-RSPVLSWFCFLLLSTLNLVSAQLDQVQWYTESDQYLLFLFST   | 181 |
| A. mississippiensis | ALILLHIFISFSVAQF-QMSILTWLCFLLLSTLRLPALAEAKRGWYDTEENEYLLFL     | 174 |
| V. paco             | AVVLLHTAISYCAQF-RSPFLSWLCSLLLLSTLRLQDVEEVKRGWYQTEENEYLLQFTL   | 173 |
| C. ferus            | AVVLLHTAISYCAQF-RSFLPSWLCFLLLSTLRLQDVEEVKRGWYQTEENEYLLQFTL    | 173 |
| P. sinensis         | AVLLLHIAISFSVAQF-QTAVLTWLCFLLLSALRVPALAEAKRGWYDSENEYLLFL      | 178 |
| M. lucifugus        | AMVILHHTVISFCVAQF-RSLFSLWLCFLLLSTLRLQDVEEIKRGWYETENEYLLQFTL   | 173 |
| L. chalumnae        | VMIFFLHTIASFTVAQL-RRPILLSWLCFLMLLYTLHMSLEEQDVEEYLLFLFSL       | 190 |
| P. hodgsonii        | AMVLLHHTTISFSVAQF-RSQFLSWLCSLLSLLSTLRLQDVEEVKRGWCTENECYLLQFTL | 173 |
| B. mutus            | AMVLIHATISFCVAQF-RSQFLSWLCSLLSLLSTLRLQDVEEVKRGWYQTEENEYLLQFTL | 173 |
| C. elegans          | AVSMAQGTVVFLTAMAYAKKTAVWVLSALPVLVY---SMHE----TNSLSDPPFLIFFTL  | 189 |
|                     | : : : * : * : * : * : : : : * : *                             |     |

|                     |                                                              |     |
|---------------------|--------------------------------------------------------------|-----|
| H. sapiens          | TVRCLYYTFSFLELCWQQLPAA-----STSYSPWMLAYVFFYPVHNGPI            | 219 |
| M. fascicularis     | TVRCLYYTFSFLELCWQQLPAA-----STSYSPWMLAYVFFYPVHNGPI            | 219 |
| P. troglodytes      | TVRCLYYTFSFLELCWQQLPAA-----STSYSPWMLAYVFFYPVHNGPI            | 219 |
| P. paniscus         | TVRCLYYTFSFLELCWQQLPAA-----STSYSPWMLAYVFFYPVHNGPI            | 219 |
| N. leucogenys       | TVRCLYYTFSFLELCWQQLPAA-----STSYSPWMLAYVFFYPVHNGPI            | 219 |
| M. musculus         | TVRCLYYTFSFLELCRQPPSAQPTPSA-----QGASHSYPLLTYVFFYPVHNGPI      | 225 |
| R. norvegicus       | TVRCLYYTFSFLELCRQPPSAQ-----RACFSFPWLLTYVFFYPVHNGPI           | 219 |
| S. scrofa           | TVRCLYYTFSFLELCWQQLPAE-----RAFYSFPWMLAYVFFYPVHNGPI           | 181 |
| C. hircus           | AVRCLCYTFSFLELCWRPPPAE-----RPSYSLPWMLAYVFFYPVHNGPV           | 219 |
| C. lupus            | TVRCLYYTFSFLELCWQMPNG-----HSFYSFPWMLAYVFFYPVHNGPI            | 219 |
| M. putorius         | TVRCLYYTFSFLELCWQEVPCG-----SSFYSFPWMLAYVFFYPVHNGPI           | 278 |
| O. orca             | TVRCLYYTFSFLELCWQQPAA-----RTFCSPWMLAYVFFYPVHNGPI             | 219 |
| C. simum            | TVRCLYYTFSFLELCWQPRPAG-----RTSYSPWMLAYVFFYPVHNGPI            | 219 |
| D. rerio            | AVCSLHCISFCLEMCWHPQLQAGRPKHCSLQNCALKTLTYQFLKLTAFCFYHPLFYNGPI | 241 |
| A. mississippiensis | TVRCLYYTFSFLELCWQGST-----KQRYHSFLWMLAYVFFYPVHNGPI            | 219 |
| V. paco             | TVRCLYYTFSFLELCWQPRPAG-----HTFYSFPWMLAYVFFYPVHNGPV           | 219 |
| C. ferus            | TVRCLYYTFSFLELCWQPRPAG-----HTFYSFPWMLAYVFFYPVHNGPI           | 219 |
| P. sinensis         | TVRCLYYTFSFLELCWQGST-----KQRYHSFPWMLAYVFFYPVHNGPI            | 223 |
| M. lucifugus        | TVRCLYYTFSFLELCWQQLPCG-----RTFYSLPWMLAYVFFYPVHNGPI           | 219 |
| L. chalumnae        | AICSLRYTFSFLEHCWYQSS-----EKKYKFLWMLAYLFFYPVHNGPV             | 235 |
| P. hodgsonii        | AVRCLCYTFSFLELCWRPPPAE-----RPSYSLPWMLAYVFFYPVHNGPV           | 219 |
| B. mutus            | TVRCLYYTFSFLELCWQPPPAE-----RPFYSLPWMLAYVFFYPVHNGPV           | 219 |
| C. elegans          | SYSMIHYISYCLEHLKGESRKE---D-----DTILKRYLRMMFFAFYQPYLF-SLI     | 236 |
|                     | : : * : * : * : * : : : * : * : * : *                        |     |

|                     |                                                                |     |
|---------------------|----------------------------------------------------------------|-----|
| H. sapiens          | LSFSEFIKQMQQQEHDSLKASLCLVALGLGRLLCWWWLAELMAHLMYMHAIYSSIPLET    | 279 |
| M. fascicularis     | LSFPEFIKQMQQQEHESLKGNSLCLVALGLGRLLCWWWLAELMAHLMYMHAIYSSIPLEA   | 279 |
| P. troglodytes      | LSFSEFIKQMQQQEHDSLKASLCLVALGLGRLLCWWWLAELMAHLMYMHAIYSSIPLET    | 279 |
| P. paniscus         | LSFSEFIKQMQQQEHDSLKASLCLVALGLGRLLCWWWLAELMAHLMYMHAIYSSIPLET    | 279 |
| N. leucogenys       | LSFPDFIKQMQQQEHDSLKASLCLVALGLGRLLCWWWLAELMAHLMYMHAIYSSIPLET    | 279 |
| M. musculus         | LNFPEFFRQMQQPELNSLQHSLSLIVAKGLGRLLCWWWLAELMVHLMYMHAIYSSAPLLES  | 285 |
| R. norvegicus       | LNFPEFFRQMQQPELNSLQHSLSLILAKGLGRLLCWWWLAELMVHLMYMHAIYSSIPLES   | 241 |
| S. scrofa           | LSFPEFLTQMPPREQSSLSKASFSILVRLGLRLLFYWVWVLMVHLMYMHAIYSSAPLLSA   | 279 |
| C. hircus           | LSFPEFIAQMQQQEQSSPKTSLSLIALGLGRLLFYWVWVLMVHLMYMHAIYSSASLLRA    | 279 |
| C. lupus            | LSFPEFIAKVMQQQEQSSPKTSLSLIALGLGRLLFYWVWVLMVHLMYMHAIYSSASLLKA   | 279 |
| M. putorius         | LSFPEFIAKVMQQQEQSSPKTSLSLIALGLGRLLFYWVWVLMVHLMYMHAIYSSASLLRA   | 338 |
| O. orca             | LSFPEFIAQMQQQEQSSPKTSLSLIALGLGRLLFYWVWVLMVHLMYMHAIYSSASLLRA    | 279 |
| C. simum            | LSPFEFIRQMQQQERRSKASLSVLVGLGRLLCWWWLAELMVHLMYMHAIYSSPTLLGA     | 279 |
| D. rerio            | MTYKDFSEQIERPLCK---VSALHVFSGILRLCWWWLAELMIHLMYMHAIYSSSLLRA     | 298 |
| A. mississippiensis | MNFDEFSKQMRREQEACRLKTNFRILLGMVRIFFWWWLAELMIHLMYMHAFYSSSHPLEA   | 279 |
| V. paco             | LSFPEFIKQMQQQEHESLKGNSLCLVALGLGRLLCWWWLAELMVHLMYMHAIYSSSLLRA   | 279 |
| C. ferus            | LSFPEFIKQMQQQEHESLKGNSLCLVALGLGRLLCWWWLAELMVHLMYMHAIYSSSLLRA   | 279 |
| P. sinensis         | MTFNEFTKQMRREQEACSLKSNLCLVLLGLGVVRIFFWWWLAELMIHLMYMHAIYSSSLLRA | 283 |
| M. lucifugus        | LSFPEFIRQMPPQEQSLPRLSLVLRARGLGRLLFYWVWVLMVHLMYMHAFYSSAPLLRA    | 279 |
| L. chalumnae        | ISYDFESKIQKQQTTRVSKMEVYALTLISICRIFLWWWLAESMIHLMYHAIYSSPTLLDA   | 295 |
| P. hodgsonii        | LSFPEFIAQMQQQEQSSPKTSLSLIALGLGRLLFYWVWVLMVHLMYMHAIYSSASLLRA    | 279 |
| B. mutus            | LSFPEFIAQMQQQEQSSPKTSLSLIALGLGRLLFYWVWVLMVHLMYMHAIYSSASLLRA    | 279 |
| C. elegans          | VLYPDFERQLRERKTRQ---RNWLDCAWSGVRIAFWWWLMEASLHFLYHEALLKNAPLYYS  | 294 |
|                     | : : * : * : * : * : : : * : * : * : *                          |     |

H. sapiens VSCWTLGGGLAQAQLFFVYKYLVLFGVPALLMRDLGLTPPALPRCVSTMFSFTGMWRYF 339  
M. fascicularis VSGWTLGGGLAQAQLFFVYKYLVLFGVPALLMRDLGLTPPALPRCVSTMFSFTGMWRYF 339  
P. troglodytes VSCWTLGGGLAQAQLFFVYKYLVLFGVPALLMRDLGLTPPALPRCVSTMFSFTGMWRYF 339  
P. paniscus VSCWTLGGGLAQAQLFFVYKYLVLFGVPALLMRDLGLTPPALPRCVSTMFSFTGMWRYF 339  
N. leucogenys VSCWTLGGGLAQAQLFFVYKYLVLFGVPALLMRDLGLTPPALPRCVSTMFSFTGMWRYF 339  
M. musculus VSCWTLGGGLAQAQLFFVYKYLVLFGVPALLMRDLGLTPPALPRCVSTMFSFTGMWRYF 345  
R. norvegicus VSCWTLGGGLAQAQLFFVYKYLVLFGVPALLMRDLGLTPPALPRCVSTMFSFTGMWRYF 301  
S. scrofa VSCWTLGGGLAQAQLFFVYKYLVLFGVPALLMRDLGLSPPLPRCVSTMFSFTGMWRYF 339  
C. hircus VSSWTLGGGLAQAQLFFVYKYLVLFGVPALLMRDLGRPPPLPRCVSTMFSFTGMWRHF 339  
C. lupus VSCWTLGGGLAQAQLFFVYKYLVLFGVPALLMRDLGLTPPALPRCVSTMFSFTGMWRYF 339  
M. putorius VSCWTLGGGLAQAQLFFVYKYLVLFGVPALLMRDLGLTPPALPRCVSTMFSFTGMWRYF 398  
O. orca VSCWTLGGGLAQAQLFFVYKYLVLFGVPALLMRDLGLTPPALPRCVSTMFSFTGMWRYF 339  
C. simum VSSWTLGGGLAQAQLFFVYKYLVLFGVPALLMRDLGLTPPALPRCVSTMFSFTGMWRYF 339  
D. rerio LPPWAMGGGLAALQVFFVYKYLVLFGVAPLLMRDLGLTPPALPRCVSTMFSFTGMWRHF 358  
A. mississippiensis MSDWTLGGGLAQAQLFFVYKYLVLFGVPALI IQMDGLKPPALPRCVSTMHSFTGMWRSF 339  
V. pacos VSCWTLGGGLAQAQLFFVYKYLVLFGVPALLMRDLGLTPPALPRCVSTMFSFTGMWRYF 339  
C. ferus VSCWTLGGGLAQAQLFFVYKYLVLFGVPALLMRDLGLTPPALPRCVSTMFSFTGMWRYF 339  
P. sinensis VSYWTLGGGLAQAQLFFVYKYLVLFGIPALI IRMDGLKPPALPRCVSTMHSFAGMWRSF 343  
M. lucifugus VSCWTLGGGLAQAQLFFVYKYLVLFGIPALLMRDLGLTPPALPRCVSTMFSFTGMWRYF 339  
L. chalumnae VESWALGGGLAQAQLFFVYKYLVLFGIPNLVVRMDGLEPPRLPRCVSTMFSFTGMWRHF 355  
P. hodgsonii VSSWTLGGGLAQAQLFFVYKYLVLFGVPALLMRDLGRPPPLPRCVSTMFSFTGMWRHF 339  
B. mutus VSCWTLGGGLAQAQLFFVYKYLVLFGVPALLMRDLGRPPPLPRCVSTMFSFTGMWRHF 339  
C. elegans LPKQDFVALGMAMGIFPHLYKAVIFGLPTLFAKLDNMDPLPGPI ILIRVTLYSKVVREF 354  
: : .:\* \*\*::\*\* :\*\* \* . : : \* \* : : : : \*\* \*\*

H. sapiens VGLHNFLIRYVYIPVGGSQHGLLGTLFSTAMTFAFVSYWGGDYDLWCWAALNWLGVTE 399  
M. fascicularis VGLHKFLIRYVYIPVGGSQHGLLGTLFSTAMTFAFVSYWGGDYDLWCWAALNWLGVTE 399  
P. troglodytes VGLHNFLIRYVYIPVGGSQHGLLGTLFSTAMTFAFVSYWGGDYDLWCWAALNWLGVTE 399  
P. paniscus VGLHNFLIRYVYIPVGGSQHGLLGTLFSTAMTFAFVSYWGGDYDLWCWAALNWLGVTE 399  
N. leucogenys VGLHNFLIRYVYIPVGGSQHGLLGTLTLLSTAMTFAFVSYWGGDYDLWCWAALNWLGVTE 399  
M. musculus VGLHNFLIRYVYIPVGGSQHGLLGTLTLLSTAMTFAFVSYWGGSYEDLWCWAALNWLGVTE 405  
R. norvegicus VGLHNFLIRYVYIPVGGSQHGLLGTLTLLSTAMTFAFVSYWGGSYEDLWCWAALNWLGVTE 361  
S. scrofa VGLHDFLIRYVYIPVGGSQHGLLGTLFSTAMTFAFVSYWGGNDYLWCWAALNWLGVTE 399  
C. hircus VGLHDFLIRYVYIPVGGSQHGLLGTLFSTAMTFAFVSYWGGNDYLWCWATLNWLGVTE 399  
C. lupus VGLHDFLIRYVYIPVGGSQHGLLGTLFSTAVTFAFVSYWGGDYDLWCWAALNWLGVTE 399  
M. putorius VGLHDFLIRYVYIPVGGSQHGLLGTLFSTAVTFAFVSYWGGDYDLWCWAALNWLGVTE 458  
O. orca VGLHDFLIRYVYIPVGGSQHGLLGTLFSTAMTFAFVSYWGGNDYLWCWATLNWLGVTE 399  
C. simum VGLHNFLIRYVYIPVGGSQHGLLGTLFSTALTFVSYWGGDYDLWCWAALNWLGVTE 399  
D. rerio VGLYKWLIRYVYIPVGGSRHGAFRKLSTALAFGFCVFWGGCHDYLLYWALNWLGVTE 418  
A. mississippiensis VGLHHFLIRYVYIPMGGSQCSVGMGLFSTAITFAFVSYWGGHNYLWYWAALNWLGVTE 399  
V. pacos VGLHDFLIRYVYIPMGGSQHGLLGTLFSTAMTFAFVSYWGGNDYLWCWAALNWLGVTE 399  
C. ferus VGLHDFLIRYVYIPMGGSQHGLLGTLFSTAMTFAFVSYWGGNDYLWCWAALNWLGVTE 399  
P. sinensis VGLHHFLIRYVYIPMGSGHGVLGMLFSTAMTFAFVSYWGGHNYLWFAALNWLGVTE 399  
M. lucifugus VGLHDFLIRYVYIPVGGSQHGLLGTLFSTAMTFAFVSYWGGHNYLWCWAALNWLGVTE 403  
L. chalumnae VGLHRWLIRYVYIPMGGSQHGSLGMLSTAMAFGVYVWGGHNYLFWAALNWLGVTE 415  
P. hodgsonii VGLHDFLIRYVYIPVGGSQHGLLGTLFSTAMTFAFVSYWGGNDYLWCWATLNWLGVTE 399  
B. mutus VGLHDFLIRYVYIPVGGSQHGLLGTLFSTAMTFAFVSYWGGNDYLWCWATLNWLGVTE 399  
C. elegans RGLYQFFKTYIFIPICAPTFLSRPKIFGVFISYGFVLLWGGFYHNNYVWGLNLLALFIE 414  
\*\* : : \* : : \* . . . : : \* : : \* \* . \* \* \* : : \* \* : : \*

H. sapiens NGVRRLEVETPCIQDSLARYFSPQARRRFHAALASCSTSMILLSNLVLFGGNEVGKTYWNR 459  
M. fascicularis NGVRRLEVETPCIQDSLARYFSPQARRRFHAALASCSTSMILLSNLVLFGGNEVGKTYWNR 459  
P. troglodytes NGVRRLEVETPCIQDSLARYFSPQARRRFHAALASCSTSMILLSNLVLFGGNEVGKTYWNR 459  
P. paniscus NGVRRLEVETPCIQDSLARYFSPQARRRFHAALASCSTSMILLSNLVLFGGNEVGKTYWNR 459  
N. leucogenys NGVRRLEVETPCIQDSLARYFSPQARRRFHAALASCSTSMILLSNLVLFGGNEVGKTYWNR 459  
M. musculus SGVRRLEVETPCVRETLARHLSQARRRHALLASCSTSMILLFNLVFLGGIQVCKTYWNR 465  
R. norvegicus SGVRRLEVETPCVRETLARHLSQARRRHALLASCSTSMILLFNLVFLGGIQVCKTYWNR 421  
S. scrofa SGVRRLEVETPCIQDSLARYFSPQARRRFHAALASCSTSMILLSNLVLFGGNEVGKTYWNR 459  
C. hircus NGVQKLVQRPVQHSLSAQFLSPGARRRHALLASCSTSMILLSNLVLFGGNSQVGIYWR 459  
C. lupus NVGQRLVETPCIQDSLARYFSPQARRRFHAALASCSTSMILLSNLVLFGGNSQVGIYWR 459  
M. putorius NAVQRLVQTPYVRSVQVFLSPQARRRFHAALASCSTAMILLSNLVLFGGNSQVGIYWR 518  
O. orca NGVQRLVQRPVQHSLSAQFLSPQARRRHALLASCSTSMILLSNLVLFGGNSQVGIYWR 459  
C. simum NGVRRLEVETPCIQDSLARYFSPQARRRFHAALASCSTSMILLSNLVLFGGNSQVGIYWR 459  
D. rerio NAFALLFSSPPLRHAIVYCLTRPMQRRLALISAFSTAFLLSNLFLFGGTHVGRIFWKK 478  
A. mississippiensis NGVRRLEVSVLVRDLIDHFFLPRICRRLHVALVAVSTSMILLSNLVLFGGNDVGIYWR 459  
V. pacos NGVQRLVQTPRIQDSLARYFSPQARRRFHAALASCSTSMILLSNLVLFGGNSQVGIYWR 459  
C. ferus NGVQRLVQTPRVQHSLSAQFLSPQARRRFHAALASCSTSMILLSNLVLFGGNSQVGIYWR 459  
P. sinensis NGVRRLEVSVLQVELIDRFSPGICRRLHVALVAISTSMILLSNLVLFGGNSQVGIYWR 463  
M. lucifugus NGVRRLEVETPCIQDSLARYFSPQARRRFHAALASCSTSMILLSNLVLFGGNSQVGIYWR 459  
L. chalumnae NGVQKLVQRPVQHSLSAQFLSPGARRRHALLASCSTSMILLSNLVLFGGNSQVGIYWR 475  
P. hodgsonii NGVQKLVQRPVQHSLSAQFLSPGARRRHALLASCSTSMILLSNLVLFGGNSQVGIYWR 459  
B. mutus NGVQKLVQRPVQHSLSAQFLSPGARRRHALLASCSTSMILLSNLVLFGGNSQVGIYWR 459  
C. elegans MGSKAIYTIESVRKWEANSDVAFRRLLAWCHILPFAIGLYSNFYFLGGSDVGAAGVQR 474  
: : : : : : \* : : \* : : \* : : \* \* \* \* \* : : \*

|                    |                                                     |     |
|--------------------|-----------------------------------------------------|-----|
| H.sapiens          | IFIQG-----WPWVTLVS-----LGFLYCYSHVGGIAWAQTYATD-----  | 493 |
| M.fascicularis     | IFIQG-----WPWVTLPV-----LGFLYCYSHVGGIAWAQTYAMD-----  | 493 |
| P.troglodytes      | IFIQG-----WPWVTLVS-----LGFLYCYSHVGGIAWAQTYATD-----  | 493 |
| P.paniscus         | IFIQG-----WPWVTLVS-----LGFLYCYSHVGGIAWAQTYATD-----  | 493 |
| N.leucogenys       | IFIQG-----WPWVTLVS-----LGFLYCYSHVGGIAWAQTYAMD-----  | 493 |
| M.musculus         | IFLQG-----WPWVTLVS-----LGFLYCYSHVDIAWAQTYTVL-----   | 499 |
| R.norvegicus       | IFLQG-----WPWVTLVS-----LGFLYCYSHVGGIAWAQTYTVL-----  | 455 |
| S.scrofa           | IFIQG-----WPWVTLVS-----LGFLYCYSHVGGIAWAQTYAVD-----  | 493 |
| C.hircus           | IFIQG-----WPCVTLVS-----LGCYCYAHVGGIAWAHTYSGN-----   | 493 |
| C.lupus            | IFIQG-----ADGLPGPPSPARAPGRAATTTTGAWFYPSVLC-----     | 497 |
| M.putorius         | IFVQG-----WPYVTLVS-----LGFLYCYSHVGGIAWAQTYSD-----   | 552 |
| O.orca             | IFIQG-----WPCVTLVS-----LGFLYCYSHVGGIAWAQTYSVN-----  | 493 |
| C.simum            | IFIQG-----WPWVTLVS-----LGFLYCYSHVGGIAWAQTYSD-----   | 493 |
| D.rerio            | LFVQG-----LLESSLEDLCVAG-----                        | 496 |
| A.mississippiensis | IFVKG-----WPWATLSV-----IGFLYCYSQVGGIEWDQMYIAD-----  | 493 |
| V.pacos            | IFIQG-----WPWVTLVS-----LGFLYCYSHVGGIAWAQTYSD-----   | 491 |
| C.ferus            | IFIQG-----WPWVTLVS-----LGFLYCYSHVGGIAWAQTYSD-----   | 491 |
| P.sinensis         | IFVEG-----WPWATLSV-----FGFLYCYSHVGGIEWDHTHCAD-----  | 497 |
| M.lucifugus        | IFIQG-----WPWVTLVS-----LGFLYCYSHVGGIAWAQTYSD-----   | 493 |
| L.chalumnae        | IFVQG-----QNDM-----                                 | 484 |
| P.hodgsonii        | IFIQG-----WPCVTLVS-----LGCYCYAHVGGIAWAHTYSGN-----   | 493 |
| B.mutus            | IFIQG-----WPWVTLVS-----LGFLYCYSHVGGIAWAHAYSGN-----  | 493 |
| C.elegans          | FLIETITFRWPFLLIIS-----LGWFHANTAMEV--DRLKSLEKSKKEKSN | 519 |

::::

**FIGURE S1.** Multiple sequence alignment of HHAT sequences from 22 species. Clustal Omega sequence alignment of HHAT sequences from 22 different species. Cysteines are highlighted in yellow except for Cys324 which is highlighted in green. The critical MBOAT residues Asp339 and His379 (numbering from human sequence) are highlighted in red. Sequences aligned: *H. sapiens* [NP\_001116306.1], *M. musculus* [NP\_659130.2], *M. fascicularis* [XP\_005540793.1], *S. scrofa* [XP\_005667927.1], *P. troglodytes* [JAA02252.1], *P. paniscus* [XP\_003814251.1], *C. hircus* [XP\_005691086.1], *C. lupus familiaris* [XP\_005622394.1], *N. leucogenys* [XP\_003273071.1], *O. orca* [XP\_004275337.1], *C. sinum sinum* [XP\_004424926.1], *D. rerio* [XP\_005158569.1], *C. elegans* [NP\_001022489.1], *R. norvegicus* [XP\_002724948.2], *A. mississippiensis* [XP\_006266096.1], *T. chinensis* [XP\_006159401.1], *V. pacos* [XP\_006198798.1], *C. ferus* [XP\_006180810.1], *P. sinensis* [XP\_006136963.1], *M. lucifugus* [XP\_006089978.1], *L. chalumnae* [XP\_006007432.1], *P. hodgsonii* [XP\_005981119.1], *B. mutus* [XP\_005888635.1].
